# Supplementary material for: Synergistic Upregulation of Target Genes by TET1 and VP64 in the dCas9–SunTag Platform
Source: PubMed Central journal article supplement (PMC7084704; doi:10.3390/ijms21051574), 2020-02-25
Supplement: ijms-21-01574-s001.pdf [file ijms-21-01574-s001.pdf]

**Table S1**

| Target gene | Target sgRNA name | Target sequence      | Primer name | Primer sequence         |
|-------------|-------------------|----------------------|-------------|-------------------------|
| CARD9       | gRNA-CARD9_3      | TGGGAGCAGCTTCCTCTGG  | CARD9-1     | CAGGCTCCTGGTGTGTCTG     |
|             |                   |                      | CARD9-2     | CTCCAGCACTCGTCATCGT     |
| KDM2B       | gRNA-KDM2B_1      | GGACTGCAAAGGCTCTGGTC | KDM2B-1     | CATGCAGCAGAAAAGCAAAA    |
|             |                   |                      | KDM2B-2     | TCCGACAAGTCTCGTTCTC     |
| RAB19       | gRNA-RAB19_1      | GCCTCAGGGTACAAAGCGCC | RAB19-1     | GCTGAAAAGCAAACCCAGAA    |
|             |                   |                      | RAB19-2     | AGCTGGAGAAGTGCATGGTT    |
| CNKSR1      | gRNA-CNKSR1_1     | TGTGAGCCCAGGTATGCAGT | CNKSR1-1    | GGCAAAACAGGAGCTGATTC    |
|             |                   |                      | CNKSR1-2    | TAGTCTGCAGGGAGTCGTC     |
| SBNO2       | gRNA-SBNO2_1      | GGTAATTGCCCTGACTTACG | SBNO2-1     | GCAGTTTGAGGCTCTGAACA    |
|             |                   |                      | SBNO2-2     | ATGGTGGACACCTGGTTGAG    |
| SPARC       | gRNA-SPAARC_1     | GAAGGGCCAAGCAATTCAAG | SPRC-1      | GGTTTCTGTTGCCTGTCTC     |
|             |                   |                      | SPRC-2      | AAGAAGATCCAGGCCCTCAT    |
| CLEC11A     | gRNA-CLEC11A_1    | ATGGTTCTGAGCGGGTTCCT | CLEC11A-1   | GAGAGGGAGGCCCTGATG      |
|             |                   |                      | CLEC11A-2   | GTCCTCCTCCATCTCCCAGT    |
| HGF         | gRNA-HGF_1        | GCTCCTATCCGAGTAAGGAA | HGF-1       | CATGTCCTCCTGCATCTCCT    |
|             |                   |                      | HGF-2       | TGCTGGATCTATTTTGATTAGGG |
| TCF21       | gRNA-TCF21_4      | CGGGAGGCCTCTTGTTTCA  | TCF21-1     | TGAGGCAGATCCTGGCTAAC    |
|             |                   |                      | TCF21-2     | TCAGGTCACCTCGGGTTTC     |
| TINAGL1     | gRNA-TINAGL1_1    | CCTGCTTGGGGTCCCCTAA  | TINAGL1-1   | CAGCCCACACCTTCACCA      |
|             |                   |                      | TINAGL1-2   | GGCACCCAGAGCCAAGTG      |

**CARD9**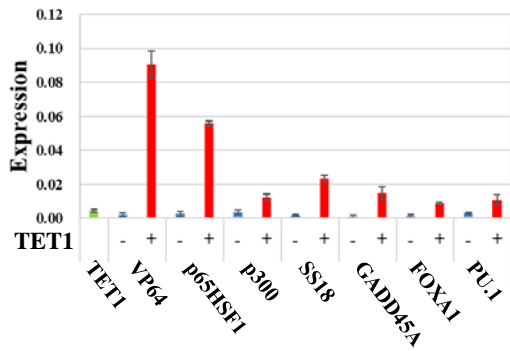**KDM2B**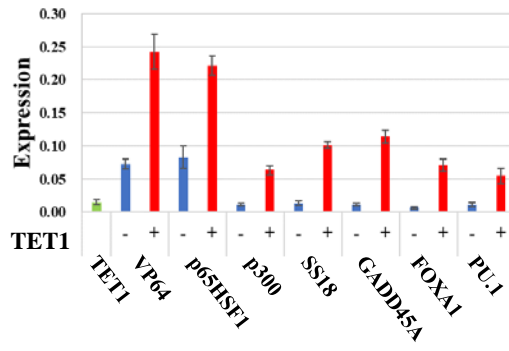**RAB19**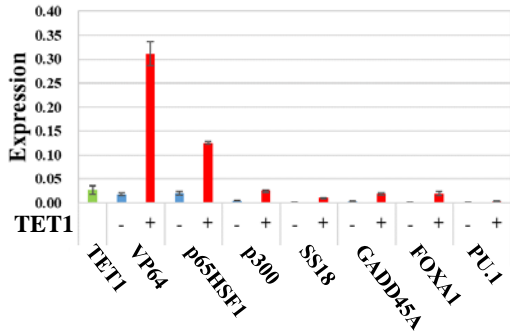**CNKSR1**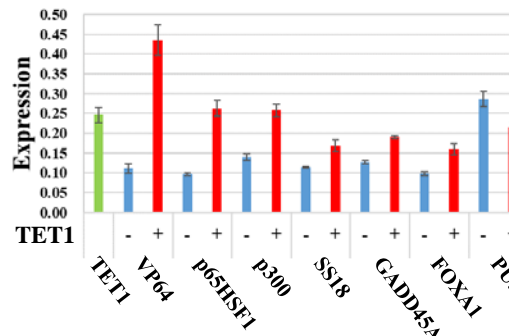**SBNO2**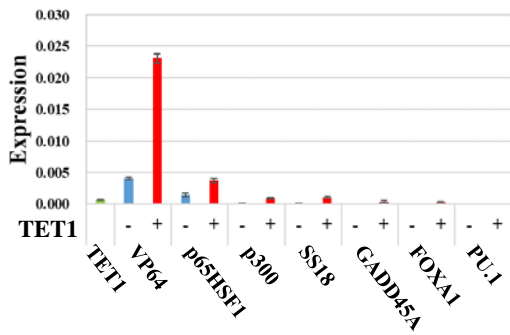**SPARC**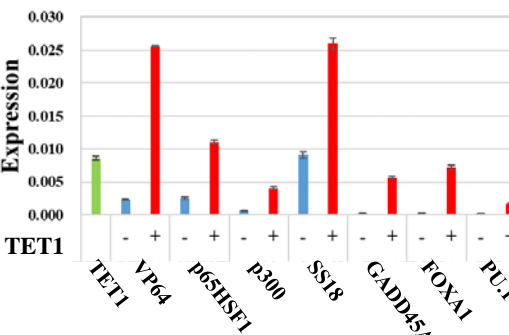**CLEC11A**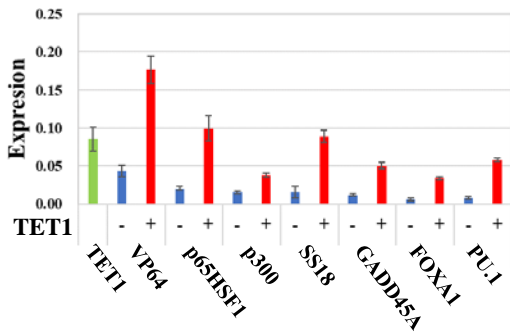**HGF**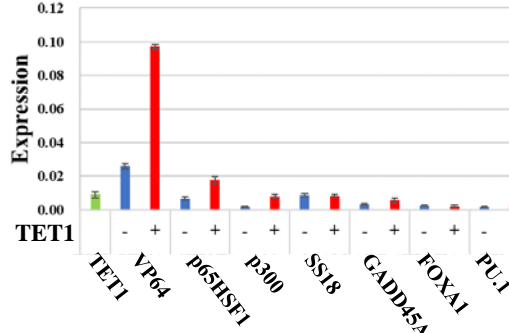**TCF21**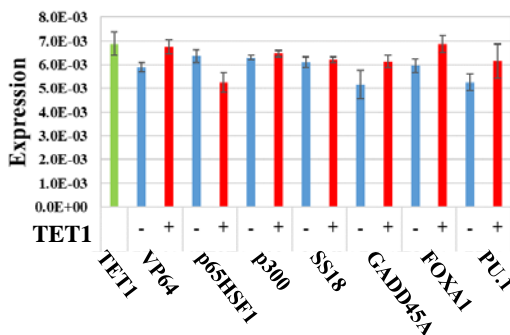**TINAGL1**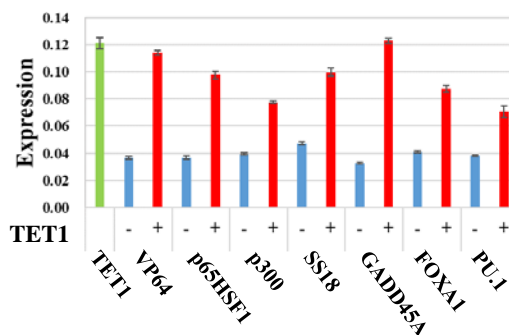

■ TET only  
■ X only  
■ both TET and X

**Supplementary Figure 1.** Expression levels (not presented as fold changes to GFP-transfected experimental controls) in A549 cells transfected with dCas9–SunTag and scFv–TET1 (green bar); dCas9–SunTag and scFv–X (blue bar); and dCas9–SunTag, scFv–TET1, and scFv–X (red bar). Expression levels, determined by RT-PCR, were normalized against the corresponding level of actin mRNA. Results obtained using sgRNAs targeting *CARD9*, *KDM2B*, *RAB19*, *CNKSR1*, *SBNO2*, *SPARC*, *CLEC11A*, *HGF*, *TCF21*, and *TINAGL1* are shown.
